# Supplementary material for: The phosphatidylcholine-hydrolysing phospholipase C NPC4 plays a role in response of Arabidopsis roots to salt stress
Source: PubMed Central journal article supplement — J Exp Bot. 2011 Apr 27;62(11):3753–63. doi: 10.1093/jxb/err039 (PMC3134337; doi:10.1093/jxb/err039), 2011-04-27
Supplement: supp_err039_00052654-file001.pdf [file supp_err039_00052654-file001.pdf]

## **Supplementary material**

The phosphatidylcholine-hydrolyzing phospholipase C NPC4 plays a role in response of Arabidopsis roots to salt stress

Daniela Kocourková, Zuzana Krčková, Přemysl Pejchar, Štěpánka Veselková, Olga Valentová,  
Rinukshi Wimalasekera, Günther F.E. Scherer, Jan Martinec

Table S1. List of UPL (Universal Probe Library) probe numbers and corresponding qRT-PCR primers

| Locus     | UPL    | Name            | Oligo Sequence           |
|-----------|--------|-----------------|--------------------------|
| At1g07230 | UPL39  | <i>NPC1 L</i>   | ctgccaagattgtccaga       |
|           |        | <i>NPC1 R</i>   | gagttgagaggccagttgga     |
| At2g26870 | UPL76  | <i>NPC2 L</i>   | tctccgagttcgctgttttc     |
|           |        | <i>NPC2 R</i>   | tgacgtccctgagtgataaaa    |
| At3g03520 | UPL93  | <i>NPC3 L</i>   | atcgaacctggaacggtgt      |
|           |        | <i>NPC3 R</i>   | agtgtgccggaattgatg       |
| At3g03530 | UPL46  | <i>NPC4 L</i>   | tgacaattaagcgaattcaa     |
|           |        | <i>NPC4 R</i>   | ttcttcgttttgtagtctccttt  |
| At3g03540 | UPL122 | <i>NPC5 L</i>   | attacgagaaactcaccaagacaa |
|           |        | <i>NPC5 R</i>   | catttgaccggatttgaca      |
| At3g48610 | UPL92  | <i>NPC6 L</i>   | aatcccgatgggaataactgg    |
|           |        | <i>NPC6 R</i>   | ggtcctttgcttcacttacga    |
| At3g18780 | UPL30  | <i>Actin2 L</i> | ccgctctttcttccaagc       |
|           |        | <i>Actin2 R</i> | ccggtaccattgtcacacac     |
| At4g05320 | UPL10  | <i>UBQ10 L</i>  | tcaccggaaagaccatcact     |
|           |        | <i>UBQ10 R</i>  | cggtagggataccctctttg     |

Table S2. List of qRT-PCR primers

| Locus     | Name                       | Oligo Sequence          |
|-----------|----------------------------|-------------------------|
| At4g26080 | <i>ABI1 L</i>              | ccatccatcattcctgatcc    |
|           | <i>ABI1 R</i>              | ccatctcacacgcttctca     |
| At5g57050 | <i>ABI2 L</i>              | gagatcgatgaatcagagtgag  |
|           | <i>ABI2 R</i>              | cattagtgactcgacatcaag   |
| AT5g27150 | <i>NHX1 L</i>              | tctgtattcggagagggtg     |
|           | <i>NHX1 R</i>              | gcaccaagcaaggacttag     |
| At5g07920 | <i>DGK1 L</i>              | agccagttatgaacaaagtcc   |
|           | <i>DGK1 R</i>              | aaccagtattcctccgca      |
| At5g52310 | <i>RD29A/LTI78/COR78 L</i> | tcaccggaactttctcatcc    |
|           | <i>RD29A/LTI78/COR78 R</i> | gtgctctgtttggctcctc     |
| At1g14660 | <i>NHX8 L</i>              | atcttacaagaaactcgtgg    |
|           | <i>NHX8 R</i>              | caatccaacccatagccag     |
| At3g11410 | <i>PP2CA L</i>             | tctgaggccgagatacgg      |
|           | <i>PP2CA R</i>             | aagacggatgaacgcaacc     |
| At5g66400 | <i>RAB18 L</i>             | tcaaggagaagtgccagg      |
|           | <i>RAB18 R</i>             | tgtccatcatccccttctc     |
| At2g47770 | <i>TSPO L</i>              | ttgctctgtttggttggg      |
|           | <i>TSPO R</i>              | cattaacagcggctacaaagg   |
| At2g01980 | <i>SOS1 L</i>              | agcgaccgattcgtctct      |
|           | <i>SOS1 R</i>              | ttagctccatattcgagagatcc |
| At5g35410 | <i>CIPK24/SOS2 L</i>       | gtgcagttttgatggaattga   |
|           | <i>CIPK24/SOS2 R</i>       | gcctttaacaaaatcctgtcg   |
| At5g24270 | <i>CBL4/SOS3 L</i>         | tatttgatgtgaagcgaatgg   |
|           | <i>CBL4/SOS3 R</i>         | cgatgaatccagtttgcgt     |
| At2g03760 | <i>SOT12 L</i>             | cccagatttcgatttctcca    |
|           | <i>SOT12 R</i>             | tccaaaatgccataaggac     |
| At1g50030 | <i>TOR L</i>               | tcgaaggcgaagtacgac      |
|           | <i>TOR R</i>               | acgcacgctcatagctctc     |

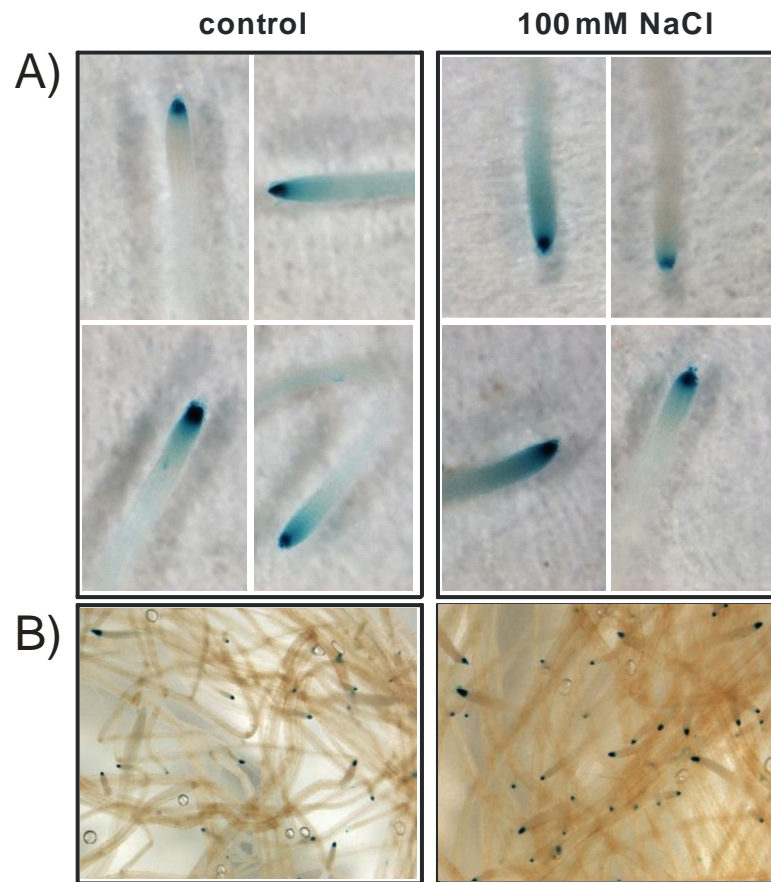

Figure S1. Histochemical analysis of  $P_{NPC3}:GUS$  expression under salt stress in Arabidopsis plants. A) Effect of salt on  $P_{NPC3}:GUS$  expression pattern in the main root of ten-day-old seedlings. The plants were grown on agar and transferred in liquid nutrient solution with or without 100 mM NaCl for 24 h. B) Effect of salt on  $P_{NPC3}:GUS$  expression pattern in roots of five-week-old Arabidopsis plants. The plants were grown hydroponically in modified half strength Hoagland's solution and exposed to 100 mM NaCl for 4 h.

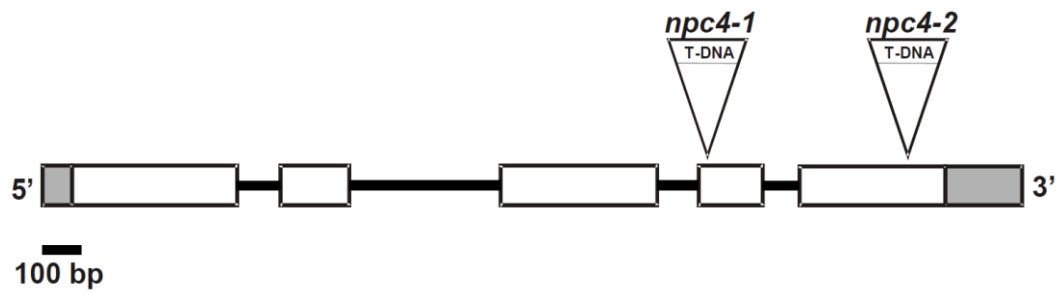

Figure S2. The position of T-DNA insertions in two *Arabidopsis npc4* mutant lines. The SALK line 046713 was marked as *npc4-1* and the GABI-KAT line 571E10 was marked as *npc4-2*.

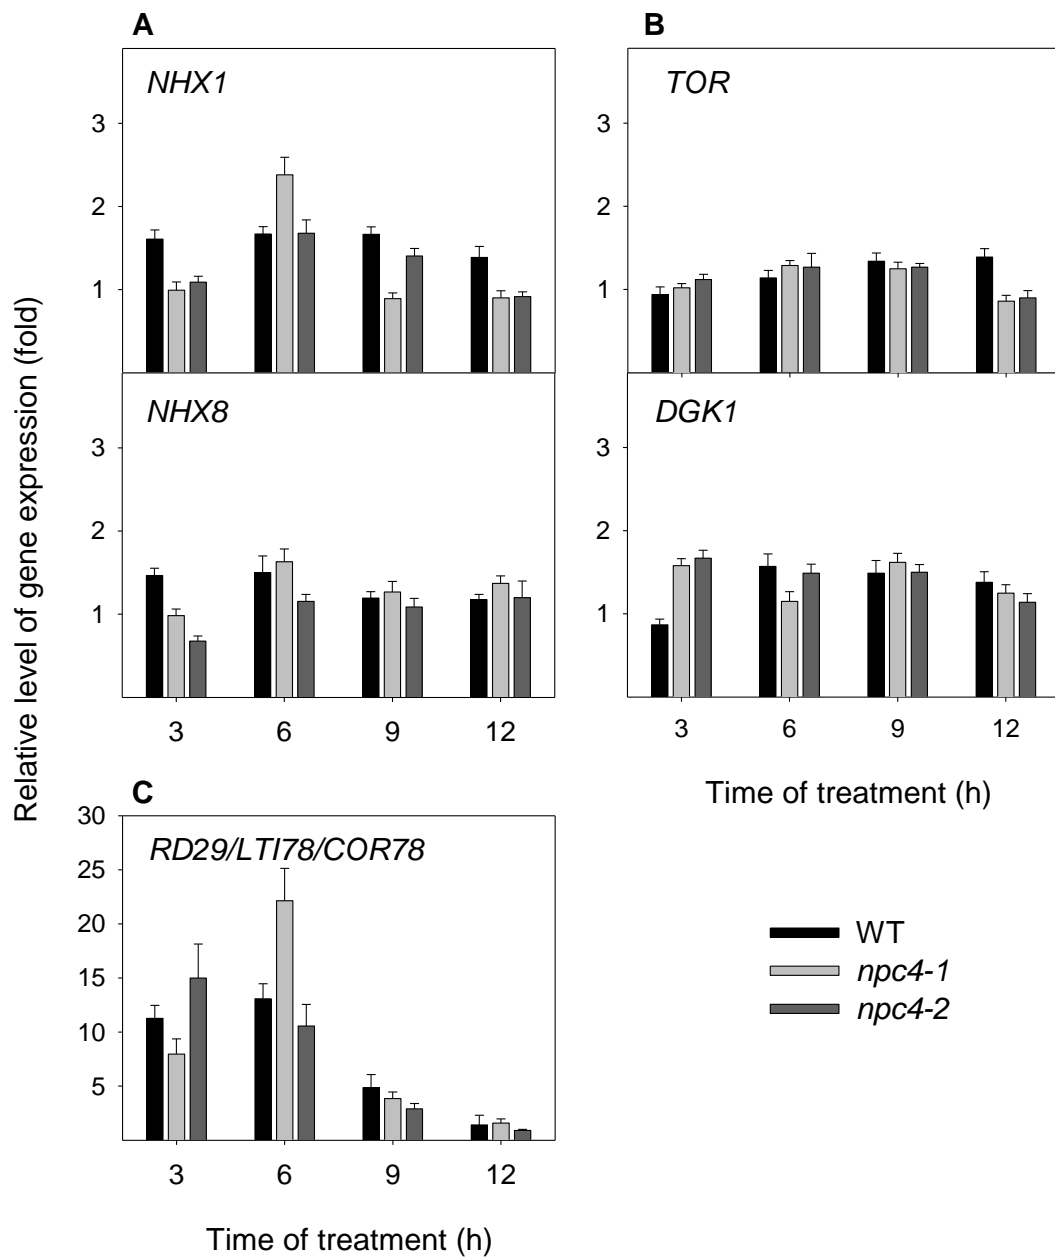

Figure S3. Relative level of gene expression of ion transporter genes *NHX1*, *NHX8* (A), phospholipid signalling related genes *TOR* and *DGK1* (B) and of *RD29/LTI78/COR78* gene (C) in WT, *npc4-1* and *npc4-2* under 100 mM NaCl treatment. The transcript levels of genes were measured by quantitative real-time PCR in roots of non-treated plants and in plants treated with 100 mM NaCl for 3, 6, 9 and 12 h. *Actin2* and *UBQ10* were used as an internal

control. The expression of the genes in non-treated controls in particular time was set to 1.

Data represents means + SE, n = 2 discrete samples from one biological experiment. This experiment was repeated twice with similar results.
